# Supplementary material for: Glycerin Suppositories and Enemas in Premature Infants: A Meta-analysis
Source: Oxford University Press journal article supplement (doi:10.1542/peds.2021-053413), 2022-03-25
Supplement: peds_2021053413supplementarydata.pdf [file peds_2021053413supplementarydata.pdf]

## Supplemental Information

**SUPPLEMENTAL TABLE 4** MEDLINE Search Strategy and Results

| No. | Searches                                                                                                                                                                                                                                                      | Results   |
|-----|---------------------------------------------------------------------------------------------------------------------------------------------------------------------------------------------------------------------------------------------------------------|-----------|
| 1   | exp glycerol/                                                                                                                                                                                                                                                 | 25 895    |
| 2   | (glycerol\$ or glycerin\$ or glyrol or microglycerin or ophthalgan or osmoglyn or rovi or vilardell).tw.                                                                                                                                                      | 50 164    |
| 3   | 1 or 2                                                                                                                                                                                                                                                        | 59 233    |
| 4   | suppositories/                                                                                                                                                                                                                                                | 3960      |
| 5   | (suppository or suppositories or suppositorium\$).tw.                                                                                                                                                                                                         | 4216      |
| 6   | 4 or 5                                                                                                                                                                                                                                                        | 5556      |
| 7   | enema/                                                                                                                                                                                                                                                        | 7155      |
| 8   | (enema\$ or clysmas\$ or clyster\$ or enteroclysis).tw.                                                                                                                                                                                                       | 10 297    |
| 9   | 7 or 8                                                                                                                                                                                                                                                        | 13 050    |
| 10  | 3 and (6 or 9)                                                                                                                                                                                                                                                | 180       |
| 11  | exp Infant/                                                                                                                                                                                                                                                   | 1 201 487 |
| 12  | ((premature\$ or pre-mature\$ or prematuritas or preterm\$1 or pre-term\$1 or (low adj\$ wt\$) or low-birth wt\$ or underweight\$) adj5 (infant\$ or neonate\$ or neonatal\$ or baby or babies or birth or child or children or childbirth or newborn\$)).mp. | 137 164   |
| 13  | (infant\$ or neonate\$ or neonatal\$ or baby or babies or newborn\$).tw.                                                                                                                                                                                      | 689 187   |
| 14  | 11 or 12 or 13                                                                                                                                                                                                                                                | 1 450 998 |
| 15  | 10 and 14                                                                                                                                                                                                                                                     | 31        |

exp, explode; mp, multiple places; tw, textword.

**SUPPLEMENTAL TABLE 5** Embase Search Strategy and Results

| No. | Searches                                                                                                                                                                                                                                     | Results   |
|-----|----------------------------------------------------------------------------------------------------------------------------------------------------------------------------------------------------------------------------------------------|-----------|
| 1   | glycerol                                                                                                                                                                                                                                     | 90 204    |
| 2   | glycerol\$:ab,ti,tn or glycerin\$:ab,ti,tn or glyrol:ab,ti,tn or microglycerin:ab,ti,tn or ophthalgan:ab,ti,tn or osmoglyn:ab,ti,tn or rovi:ab,ti,tn or vilardell:ab,ti,tn                                                                   | 65 399    |
| 3   | 1 or 2                                                                                                                                                                                                                                       | 92 133    |
| 4   | suppository                                                                                                                                                                                                                                  | 7839      |
| 5   | suppository:ab,ti,tn or suppositories:ab,ti,tn or suppositorium\$:ab,ti,tn                                                                                                                                                                   | 7348      |
| 6   | 4 or 5                                                                                                                                                                                                                                       | 9320      |
| 7   | enema'/exp                                                                                                                                                                                                                                   | 11 781    |
| 8   | enema\$:ab,ti,tn or clysmas\$:ab,ti,tn or clyster\$:ab,ti,tn or enteroclysis:ab,ti,tn                                                                                                                                                        | 17 644    |
| 9   | 7 or 8                                                                                                                                                                                                                                       | 21 818    |
| 10  | 3 and (6 or 9)                                                                                                                                                                                                                               | 580       |
| 11  | prematurity or 'low birth wt' or newborn or infant                                                                                                                                                                                           | 1 480 748 |
| 12  | ((premature\$ or pre-mature\$ or prematuritas or preterm\$ or pre-term\$ or (low* NEAR/3 (wt* OR wt)) or underweight\$) and (infant\$ or neonate\$ or neonatal\$ or baby or babies or birth or child or children or childbirth or newborn\$) | 258 429   |
| 13  | infant\$:ti,ab,tn or neonate\$:ti,ab,tn or neonatal\$:ti,ab,tn or baby:ti,ab,tn or babies:ti,ab,tn or newborn\$:ti,ab,tn                                                                                                                     | 976 375   |
| 14  | 11 or 12 or 13                                                                                                                                                                                                                               | 1 715 196 |
| 15  | 10 and 14                                                                                                                                                                                                                                    | 87        |

ab, abstract; exp, explode; ti, title; tn, trade name.

**SUPPLEMENTAL TABLE 6** Cochrane Central Register of Controlled Trials Search Strategy and Results

| No. | Searches                                                                                                                                                                                                                                                   | Results |
|-----|------------------------------------------------------------------------------------------------------------------------------------------------------------------------------------------------------------------------------------------------------------|---------|
| 1   | (glycerol):ti,ab,kw                                                                                                                                                                                                                                        | 2091    |
| 2   | (glycerol\$ or glycerin\$ or glyrol or microglycerin<br>orophthalgan or osmoglyn or rovi or<br>vilardell):ti,ab,kw                                                                                                                                         | 2659    |
| 3   | 1 or 2                                                                                                                                                                                                                                                     | 2659    |
| 4   | (suppositories):ti,ab,kw                                                                                                                                                                                                                                   | 1479    |
| 5   | (suppository or suppositories or<br>suppositorium\$):ti,ab,kw                                                                                                                                                                                              | 2455    |
| 6   | 4 or 5                                                                                                                                                                                                                                                     | 2455    |
| 7   | (enema):ti,ab,kw                                                                                                                                                                                                                                           | 2082    |
| 8   | (enema\$ or clysmas\$ or clyster\$ or<br>enteroclysis):ti,ab,kw                                                                                                                                                                                            | 2123    |
| 9   | 7 or 8                                                                                                                                                                                                                                                     | 2123    |
| 10  | 3 and (6 or 9)                                                                                                                                                                                                                                             | 120     |
| 11  | (infant):ti,ab,kw                                                                                                                                                                                                                                          | 54 766  |
| 12  | (premature\$ or pre-mature\$ or prematuritas or<br>preterm\$ or pre-term\$ or (low* NEAR/3 (wt*<br>or wt)) or underweight\$) and (infant\$ or<br>neonate\$ or neonatal\$ or baby or babies or<br>birth or child or children or childbirth or<br>newborn\$) | 23 869  |
| 13  | (infant\$ or neonate\$ or neonatal\$ or baby or<br>babies or newborn\$):ti,ab,kw                                                                                                                                                                           | 77 579  |
| 14  | 11 or 12 or 13                                                                                                                                                                                                                                             | 81 804  |
| 15  | 10 and 14                                                                                                                                                                                                                                                  | 36      |

ab, abstract; kw, keyword; ti, title.
